# Supplementary material for: Multiomic Characterization of High-Grade Serous Ovarian Carcinoma Enables High-Resolution Patient Stratification
Source: PubMed Central journal article supplement (PMC9662902; doi:10.1158/1078-0432.ccr-22-0368), 2022-06-13
Supplement: ccr-22-0368_supplementary_data_suppsd1.pdf [file ccr-22-0368_supplementary_data_suppsd1.pdf]

1 **Multiomic characterisation of high grade serous carcinoma enables high resolution patient**  
2 **stratification**

3 **Hollis et al.**

4 **SUPPLEMENTARY INFORMATION**

5

6 **SUPPLEMENTARY METHODS**

7 ***1. Pathology review and immunohistochemistry for WT1 and p53***

8 H&E-stained slides underwent pathology review by two expert gynaecological pathologists (ARWW,  
9 WGM) prior to the initial transcriptomic characterisation of these samples (1,2). Prior to inclusion in  
10 the matched genomic-transcriptomic HGSOC study, cases were subject to additional pathology review  
11 (CSH); cases uncertain to represent HGSOC (n=26) underwent IHC for WT1 and p53 to aid histotyping  
12 (HGSOC: WT1 positive, p53 aberrant expression pattern) (Figure S1).

13 WT1 and p53 IHC was performed on the Leica BOND III Autostainer using IHC protocol F with 1:1000  
14 anti-WT1 6F-H2 antibody (DAKO) or 1:50 anti-p53 DO-7 antibody (DAKO). For WT1, positive staining  
15 was defined as positive tumour nuclei; negative staining was defined as no tumour nuclear staining  
16 with corresponding positive stromal cells. For p53, aberrant positive diffuse tumour nuclear staining  
17 or complete absence of tumour nuclear staining was defined as aberrant expression (3); variable  
18 nuclear intensity was defined as wild-type pattern. Stromal cells served as an internal positive control  
19 for both markers.

20 ***2. CCNE1 and EMSY copy number assays***

21 *CCNE1* and *EMSY* copy number (CN) were quantified by TaqMan qPCR Copy Number Assays  
22 (Hs07158517\_cn and Hs06316346\_cn, ThermoFisher Scientific) using the StepOne Plus Real-Time PCR  
23 System (Applied Biosystems, ThermoFisher Scientific) and StepOne Software Version 2.3 with 10ng

24 template DNA as determined by HS qubit assay. RNaseP reference assay was used as a copy number  
25 reference assay. NA12878 human reference DNA was purchased from the Coriell Institute and  
26 included in each run. CN variants were called with CopyCaller v2.0 software using NA12878 as a  
27 calibrator sample (CN=2).

28 *CCNE1* copy number gain (*CCNE1g*) was defined as  $\geq 4$  *CCNE1* copies. *EMSY* amplification was defined  
29 as  $\geq 6$  copies of *EMSY*. FUOV1 and OVCAR3 cell line DNA samples were included as controls for gain of  
30 *CCNE1* and *EMSY*, respectively.

### 31 **3. Custom Integrated DNA Technologies Gene Capture Panel**

32 High throughput sequencing was performed using a custom Integrated DNA Technologies (IDT) gene  
33 capture panel with unique molecular indices (UMIs). Whole genome libraries were generated and  
34 pooled for target capture. The gene target panel was designed to capture all exonic regions of: *ABCB1*,  
35 *AC004223.3*, *ARID1A*, *ATM*, *ATR*, *ATRX*, *BAP1*, *BARD1*, *BCL2L1*, *BLM*, *BRAF*, *BRCA1*, *BRCA2*, *BRIP1*,  
36 *C11orf65*, *CCNE1*, *CDK12*, *CHD4*, *CHEK1*, *CHEK2*, *CTNNB1*, *EGFR*, *EMSY*, *ERBB2*, *ERCC4*, *EZH2*,  
37 *FANCA*, *FANCB*, *FANCC*, *FANCD2*, *FANCE*, *FANCF*, *FANCG*, *FANCI*, *FANCL*, *FANCM*, *GNAS*, *KIT*,  
38 *KRAS*, *MAD2L2*, *MDM2*, *MLH1*, *MRE11*, *MSH2*, *MSH6*, *MUS81*, *MUTYH*, *NBN*, *NDUFB2*, *NF1*, *NF2*,  
39 *NRAS*, *PALB2*, *PARP1*, *PARP2*, *PAXIP1*, *PDGFRA*, *PER3*, *PIK3CA*, *PMS2*, *PPP2R1A*, *PPP2R2A*, *PRKDC*,  
40 *PTEN*, *RAD50*, *RAD51*, *RAD51B*, *RAD51C*, *RAD54L*, *RB1*, *RNASEH2A*, *RNASEH2B*, *RNASEH2C*, *RPA1*,  
41 *RUNDC3B*, *SHFM1*, *SLC25A40*, *SLFN11*, *SLX4*, *TOE1*, *TP53*, *TP53BP1*, *UBE2T*, *VRK2*. Whole genome  
42 libraries were generated using 200ng input DNA and pooled into groups of 16 for target gene capture  
43 and sequencing using an Illumina NextSeq 550 at the Edinburgh Clinical Research Facility, Western  
44 General Hospital, Edinburgh, UK. The median per-sample mean target coverage was 593X (range 205-  
45 3278X).

46

47

#### 48 **4. Processing of sequencing data and variant calling**

49 Sequence reads were processed using the bcbio v1.0.6 high throughput sequence analysis pipeline:  
50 reads were aligned to hg38 with bwa v0.7.17, sorted and duplicates marked with bamsormadup  
51 (biobambam v2.0.79), UMIs were added as tags with umis v0.9.0b0, files were converted to BAM  
52 format and indexed using samtools v1.6. Reads were then grouped by UMI, and consensus reads were  
53 called and filtered with fgbio v0.4.0. Consensus reads were extracted with bamtofastq (biobambam)  
54 and re-aligned, sorted and indexed. The aligned consensus reads underwent base quality score  
55 recalibration with the Genome Analysis Toolkit (GATK) v3.8 and variant calling was performed using a  
56 majority vote system from three variant callers (Freebayes v1.1.0.46 (4), VarDict Java v1.5.1 (5), and  
57 GATK Mutect2 (6)). The DKFZ bias filter was applied to identify likely false positive variants caused by  
58 strand bias or FFPE-induced DNA damage. Owing to the reported ubiquitous p53 disruption in HGSOC,  
59 *TP53* wild-type cases underwent manual review of aligned reads in IGV to confirm wild-type status;  
60 24 further mutations were identified by manual review, the vast majority of which (n=20) were splice  
61 site mutations toward read ends.

#### 62 **5. Filtering of called variants**

63 Called variants at a minimum 10% allele frequency were annotated using the Ensembl VEP v90.9  
64 against Ensembl release 90 and filtered using VEP annotation and the ClinVar database (7) to retain  
65 only likely functional variation: variants documented as pathogenic were retained as mutations, and  
66 those documented as benign were filtered. Within the remaining callset, nonsense mutations,  
67 frameshifting indels and splice site variants were retained as likely detrimental variants. Remaining  
68 synonymous, missense non-coding and undocumented significance variants were filtered as variants  
69 of uncertain significance.

70

71

## 72 **6. Transcriptomic characterisation and subtyping**

73 Gene expression data were generated as part of a previous study identifying transcriptionally-defined  
74 molecular subtypes of HGSOC (1,2). Samples were characterised in a larger training cohort (n=247  
75 HGSOC in the present study), and a subsequent validation cohort (n=115 HGSOC in the present study).  
76 RNA was extracted from macrodissected FFPE tumor material using the Roche High Pure FFPE RNA  
77 Isolation kit, cDNA was amplified using the NuGEN FFPE WT-Ovation FFPE System kit, then fragmented  
78 and labelled using the NuGEN Encore Biotin Module. Resultant products were hybridisation to the  
79 Ovarian DSA™ cDNA microarray platform. Each cohort was pre-processed using the Robust Multi-  
80 Array Average (RMA) method prior to a quality control.

81 TCGA- and Tothill-based transcriptomic subtypes were determined using the ConsensusOv R package  
82 (8) with the 'ConsensusOv' and 'Helland' approaches.

83 *EMSY* overexpression was defined as expression within the top 14% of cases, as indicated  
84 recommended by the previous *EMSY* expression study (2) (status already available for the training  
85 cases from the previous study, and determined for the validation cases accordingly).

## 86 **7. Immune cell infiltration analysis**

87 Tumour infiltrating CD3-positive and CD8-positive immune cells were quantified by  
88 immunohistochemistry of tumour tissue microarrays (TMAs); three 0.8mm cores were taken from a  
89 tumour-containing FFPE tumour block per patient to construct the HGSOC cohort TMA. 4um TMA  
90 sections were stained for CD3 and CD8 using the Leica BOND III Autostainer and Leica BOND ready-to-  
91 use anti-CD3 and anti-CD8 antibodies with IHC protocol F. Stained sections were imaged and analysed  
92 using QuPath version 0.1.2. Tumour area was marked as a region of interest and positive and negative  
93 cells were counted using the positive cell detection protocol. Where cases were unevaluable due to  
94 damaged/missing cores (n=24 for CD8, n=24 for CD3), whole slide 4um FFPE sections were stained for  
95 CD3 and CD8 where available (n=21 for CD8, n=21 for CD3) and virtual TMAs were constructed using

96 random sampling of 3 tumour-containing regions equivalent to the area of triplicate TMA cores. These  
97 were then analysed as above.

98 Automated positive cell quantification was validated by manual scoring of a subset of tumour-  
99 containing cores by two human observers (RLH, AHP) (180 randomly selected cores per marker),  
100 demonstrating excellent correlation between human and machine scoring (spearman's  $\rho > 0.95$ ,  
101  $P < 0.0001$  for both observers against QuPath).

102 Positive infiltrating cell burden was quantified as the percentage of positive cells within tumour islets.

### 103 **8. Immunohistochemistry for PTEN and RB**

104 PTEN and RB protein loss was detected by IHC using sections of the HGSOc TMA. PTEN IHC used 1:50  
105 M3627 clone 6H2.1 (DAKO); RB IHC used 1:100 NCL-L-RB-358 (Leica). Loss was defined as complete  
106 loss of positive staining in tumour cells with positive adjacent stromal staining. Wild-type pattern was  
107 defined as positive tumour cell staining. Two observers scored each core independently (RLH, YI).  
108 Disagreement was resolved by subsequent discussion to reach a consensus call; where a consensus  
109 was not agreed, staining was regarded as non-evaluable.

110 Where cases were unevaluable due to damaged/missing cores or equivocal staining (n=33 for PTEN,  
111 n=44 for RB), whole slide 4 $\mu$ m FFPE sections were stained for PTEN and RB where available (n=21 for  
112 PTEN, n=34 for RB) and scored as above.

### 113 **9. Copy number analysis from off-target sequencing reads**

114 Aligned bam files produced by the bcbio nextgen workflow were used for further CN analysis. Relative  
115 CN for 50kB segments of the genome were determined using the CopywriteR R package (9), whereby  
116 off-target reads are used to produce genome-wide CN estimates.

117 CN loss events were defined as regions with a log<sub>2</sub> CN ratio of  $\leq -2$ ; CN gain events were defined as  
118 regions with a log<sub>2</sub> CN ratio of  $\geq 1.5$ . For estimating CN of *RB1* and *PTEN*, the mean CN across the 50kB  
119 segments encompassing *RB1* and *PTEN* were calculated as the overall gene CN. For quantification of

120 total CN gains, adjacent 50kB segments that demonstrated CN gain were merged to be counted as a  
121 single large CN gain events (using a 10% tolerance for the CN gain threshold in adjacent segments).  
122 The same approach was applied when quantifying the total number of loss events.

123 Detection of structural variants such as translocations and inversions was not possible due to the need  
124 for split read coverage and high sequencing depth across breakpoints which are typically intronic (10);  
125 these events are therefore extremely challenging to identify based on short read sequencing data of  
126 exonic regions and off-target reads.

#### 127 *10. Response and progression data*

128 Radiological response to first- and second-line chemotherapy was defined using measured change in  
129 disease using bidirectional measurements: complete response was defined as complete resolution of  
130 pre-treatment disease, partial response (PR) was defined as disease reduction by  $\geq 50\%$ , progressive  
131 disease (PD) was defined as radiologically-confirmed appearance of new lesions or  $\geq 50\%$  increase in  
132 tumour size. Evaluable cases not reaching criteria for PR or PD were classified as stable disease (SD).

133 CA125 tumour marker response was evaluated using GCIg criteria (11): complete response (GCIg-CR);  
134 was defined as confirmed normalisation of CA125 after a pre-treatment baseline value at least twice  
135 the upper limit of normal; partial response (GCIg-50%) was defined as confirmed reduction of CA125  
136 by at least 50% from a baseline value at least twice the upper limit of normal. CA125 progression was  
137 defined as confirmed doubling of CA125. Evaluable cases not reaching criteria for response or PD were  
138 classified as no change in CA125.

139 Progression-free survival (PFS) was defined as the time from pathologically confirmed diagnosis to first  
140 progression event (radiological PD, radiologically confirmed recurrence or CA125 progression by GCIg  
141 criteria). 32 cases were non-evaluable for PFS time due to insufficient investigations.

142

143 **SUPPLEMENTARY TABLES**

144 Supplementary Table S1. Identified mutations from targeted sequencing of 362 HGSOC cases

| Gene                                                                                                                                                                                                                                                                                                            | HGSOC cases with mutation | %    |
|-----------------------------------------------------------------------------------------------------------------------------------------------------------------------------------------------------------------------------------------------------------------------------------------------------------------|---------------------------|------|
| <i>TP53</i>                                                                                                                                                                                                                                                                                                     | 355                       | 98.1 |
| <i>BRCA1</i>                                                                                                                                                                                                                                                                                                    | 46                        | 12.7 |
| <i>BRCA2</i>                                                                                                                                                                                                                                                                                                    | 24                        | 6.6  |
| <i>RB1</i>                                                                                                                                                                                                                                                                                                      | 11                        | 3.0  |
| <i>NF1</i>                                                                                                                                                                                                                                                                                                      | 10                        | 2.8  |
| <i>NF2, PIK3CA</i>                                                                                                                                                                                                                                                                                              | 8                         | 2.2  |
| <i>CDK12</i>                                                                                                                                                                                                                                                                                                    | 5                         | 1.4  |
| <i>ARID1A</i>                                                                                                                                                                                                                                                                                                   | 4                         | 1.1  |
| <i>FANCA, KRAS, SLFN11, PER3, BRIP1</i>                                                                                                                                                                                                                                                                         | 3                         | 0.8  |
| <i>MSH6, CTNNB1, SLX4, CHEK2, PRKDC</i>                                                                                                                                                                                                                                                                         | 2                         | 0.6  |
| <i>CHD4, AC004223.3, PTEN, EMSY, FANCF, BRAF, PARP2, PAXIP1, ATM, CCNE1, RAD51C, BAP1, NBN, PALB2, FANCM, TP53BP1, GNAS, FANCC, RNASEH2B, PPP2R1A, MSH2, SLC25A40, ERCC4</i>                                                                                                                                    | 1                         | 0.3  |
| <i>ABCB1, ATR, ATRX, BARD1, BCL2L1, BLM, C11orf65, CHEK1, EGFR, ERBB2, EZH2, FANCB, FANCD2, FANCE, FANCG, FANCI, FANCL, KIT, MAD2L2, MDM2, MLH1, MRE11, MUS81, MUTYH, NDUFB2, NRAS, PARP1, PDGFRA, PMS2, PPP2R2A, RAD50, RAD51, RAD51B, RAD54L, RNASEH2A, RNASEH2C, RPA1, RUNDC3B, SHFM1, TOE1, UBE2T, VRK2</i> | 0                         | 0.0  |

145 HGSOC, high grade serous ovarian carcinoma

146 Supplementary Table S2. Comparison of *EMSY* overexpression versus copy number status

|                              | <b><i>EMSY</i> expression status</b> |           |
|------------------------------|--------------------------------------|-----------|
|                              | Overexpressed                        | Wild-type |
| <b><i>EMSY</i> CN status</b> |                                      |           |
| Amplified                    | 10                                   | 14        |
| Non-amplified                | 42                                   | 296       |
| Chi-squared test P<0.001     |                                      |           |

147 For amplification status as a predictor of overexpression: positive predictive value 0.42 (95% CI 0.22-  
 148 0.63); negative predictive value 0.88 (95% CI 0.84-0.91); sensitivity 0.19 (95% CI 0.10-0.33); specificity  
 149 0.95 (95% CI 0.93-0.98)

150

151 Supplementary Table S3. Multivariable analysis of overall survival across HRR-centric subgroups

|                                |                   | <b>mHR</b> | <b>95% CI</b> | <b>P-value</b> |
|--------------------------------|-------------------|------------|---------------|----------------|
| <b>HRR-centric subtype</b>     | <i>BRCA1m</i>     | 0.88       | 0.61-1.27     | 0.500          |
|                                | <i>BRCA2m</i>     | 0.40       | 0.25-0.64     | <0.001         |
|                                | <i>CCNE1g</i>     | 1.52       | 1.11-2.09     | 0.013          |
|                                | high- <i>EMSY</i> | 0.51       | 0.32-0.81     | 0.007          |
|                                | HRRwt             | ref        | ref           | ref            |
| <b>FIGO stage at diagnosis</b> | I                 | 0.48       | 0.23-0.99     | 0.049          |
|                                | II                | 0.41       | 0.24-0.70     | 0.002          |
|                                | III               | ref        | ref           | ref            |
|                                | IV                | 1.42       | 1.06-1.90     | 0.031          |
|                                | Unknown           | 0.77       | 0.33-1.85     | 0.521          |
| <b>Age at diagnosis</b>        | Years             | 1.01       | 0.99-1.02     | 0.521          |

152 Stratified by residual disease status. mHR, multivariable hazard ratio; 95% CI, 95% confidence interval;  
 153 HRR, homologous recombination DNA repair; *BRCA1m*, *BRCA1*-mutant; *BRCA2m*, *BRCA2*-mutant;  
 154 *CCNE1g*, *CCNE1* copy number gain; high-*EMSY*, *EMSY* overexpression; HRRwt, non-*CCNE1g* HRR wild-  
 155 type; ref, reference population.

156

157 Supplementary Table S4. Comparison of transcriptomic subtyping approaches

| <b>TCGA subtype</b> | <b>Tothill subtype</b> |           |           |           |
|---------------------|------------------------|-----------|-----------|-----------|
|                     | <b>C1</b>              | <b>C2</b> | <b>C4</b> | <b>C5</b> |
| <b>DIF (n=102)</b>  | 5 (5%)                 | 15 (15%)  | 71 (70%)  | 11 (11%)  |
| <b>IMR (n= 94)</b>  | 12 (13%)               | 62 (66%)  | 18 (19%)  | 2 (2%)    |
| <b>MES (n=99)</b>   | 88 (89%)               | 3 (4%)    | 1 (1%)    | 7 (7%)    |
| <b>PRO (n=67)</b>   | 5 (7%)                 | 0 (0%)    | 1 (1%)    | 61 (91%)  |

158

159



160 Supplementary Table S5. Rates of complete surgical resection across molecular subgroups

|                                |                        | MacroRD | Zero RD | Unknown RD | % Zero RD | P-value             | Bonferroni-adjusted P-value |
|--------------------------------|------------------------|---------|---------|------------|-----------|---------------------|-----------------------------|
| <b>HRR-centric subtype</b>     | nBRCA-HRRm             | 4       | 2       | 0          | 33.3      | 0.0165 <sup>c</sup> | 0.066                       |
|                                | <i>BRCA1</i> m         | 29      | 12      | 5          | 29.3      |                     |                             |
|                                | <i>BRCA2</i> m         | 17      | 4       | 3          | 19.0      |                     |                             |
|                                | <i>CCNE1</i> g         | 40      | 10      | 3          | 20.0      |                     |                             |
|                                | <i>EMSY</i>            | 21      | 9       | 1          | 30.0      |                     |                             |
|                                | HRRwt                  | 159     | 28      | 15         | 15.0      |                     |                             |
| <b>Transcriptional subtype</b> | DIF                    | 74      | 20      | 8          | 21.3      | 0.0034 <sup>d</sup> | 0.0134                      |
|                                | IMR                    | 58      | 26      | 10         | 31.0      |                     |                             |
|                                | MES                    | 83      | 11      | 5          | 11.7      |                     |                             |
|                                | PRO                    | 55      | 8       | 4          | 12.7      |                     |                             |
| <b>CD3+ infiltration</b>       | CD3-high <sup>a</sup>  | 210     | 43      | 16         | 17.0      | 0.0569              | 0.2275                      |
|                                | Reference <sup>b</sup> | 55      | 22      | 10         | 28.6      |                     |                             |
| <b>CD8+ infiltration</b>       | CD8-high <sup>a</sup>  | 213     | 39      | 17         | 15.5      | 0.0018              | 0.0072                      |
|                                | Reference <sup>b</sup> | 55      | 26      | 9          | 32.1      |                     |                             |

161 <sup>a</sup>infiltration burden within the top quartile; <sup>b</sup>infiltration burden within the lower three quartiles. <sup>c</sup>HRR-  
162 aberrant (*BRCA1*m, *BRCA2*m, *EMSY* overexpression or nBRCA-HRRm) vs HRRwt; <sup>d</sup> IMR vs other  
163 subtypes. MacroRD, macroscopic residual disease; Zero RD, complete macroscopic resection; HRR,  
164 homologous recombination DNA repair; nBRCA-HRRm, non-*BRCA1/2* HRR gene mutation; *BRCA1*m,  
165 *BRCA1*-mutant; *BRCA2*m, *BRCA2*-mutant; *CCNE1*g, *CCNE1* copy number gain; high-*EMSY*, *EMSY*  
166 overexpression; HRRwt, non-*CCNE1*g HRR wild-type.

167

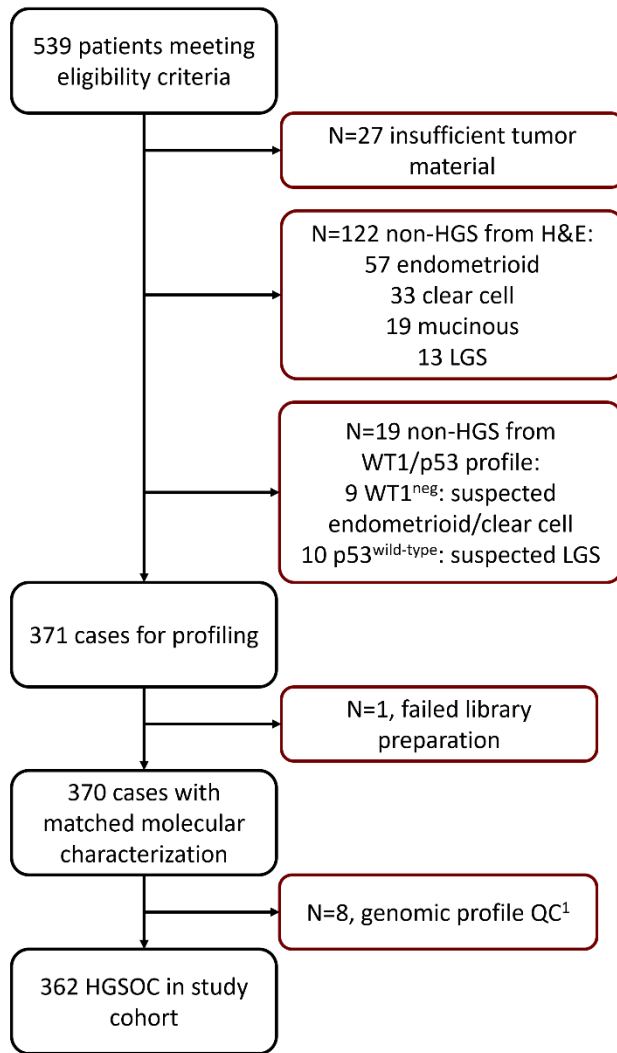

169

170 Figure S1. Case flow diagram for high grade serous ovarian carcinoma (HGSOC) cohort. <sup>1</sup>Excluded as  
 171 likely non-HGS from genomic profile: *TP53* wild-type with mutation of *ARID1A*, *KRAS*, *PIK3CA* or  
 172 *CTNNB1*. QC, quality control. LGS, low grade serous.

173

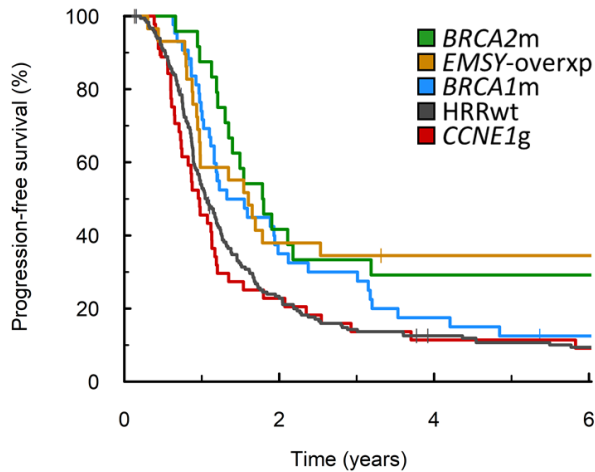

174

175 Figure S2. Progression-free survival of homologous recombination repair (HRR)-centric subtypes.  
 176 *BRCA2m*, *BRCA2* mutant; *BRCA1m*, *BRCA1* mutant; *EMSY-overxp*; overexpression of *EMSY*; *CCNE1g*,  
 177 gain of *CCNE1*; HRRwt, non-*CCNE1g* HRR wild-type.

178

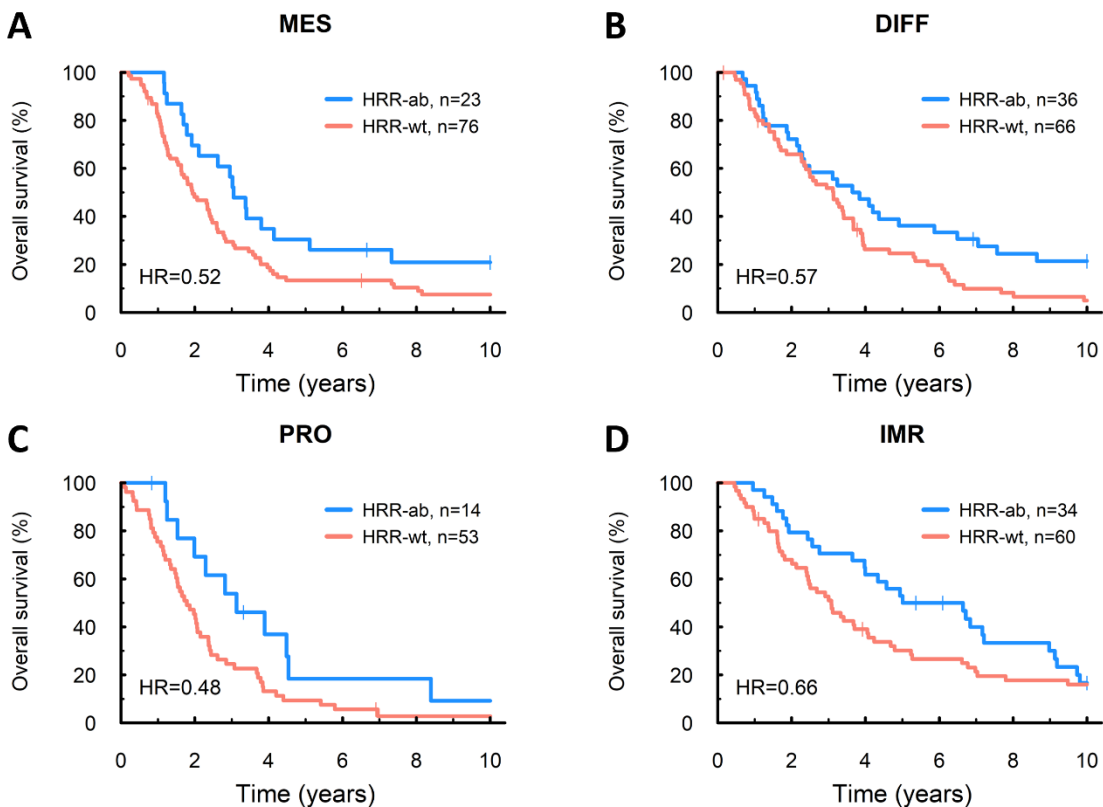

179

180 Figure S3. Impact of homologous recombination repair aberrations (HRR-aberrant: *BRCA1* mutation,  
 181 *BRCA2* mutation, *EMSY*-overexpression or non-*BRCA* HRR gene mutation) on overall survival within  
 182 TCGA transcriptomic subtypes. (A) Overall survival within the MES subtype. (B) Overall survival within  
 183 the DIFF subtype. (C) Overall survival within the PRO subtype. (D) Overall survival within the IMR  
 184 subtype. HRR-ab, HRR-aberrant; HRR-wt, HRR wild-type reference population: *CCNE1*-gained plus  
 185 other HRR wild-type cases.

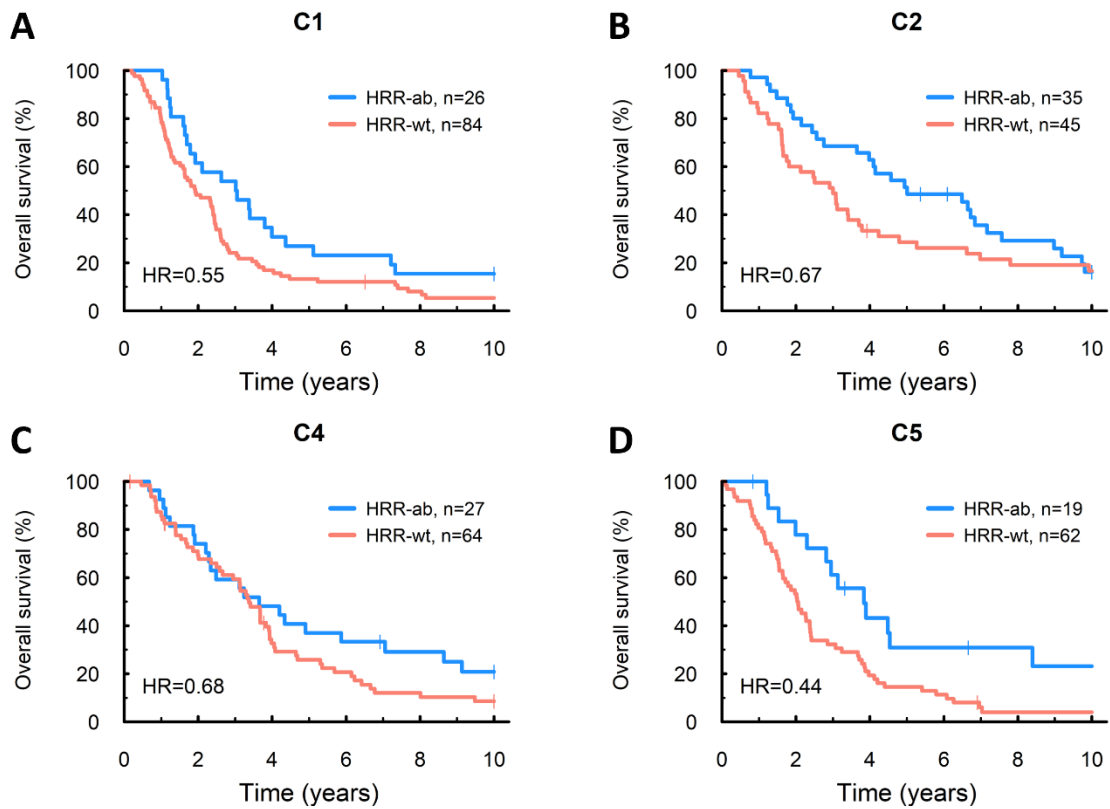

186

187 Figure S4. Impact of homologous recombination repair aberrations (HRR-aberrant: *BRCA1* mutation,  
 188 *BRCA2* mutation, *EMSY*-overexpression or non-*BRCA* HRR gene mutation) on overall survival within  
 189 Tothill transcriptomic subtypes. (A) Overall survival within the C1 subtype. (B) Overall survival within  
 190 the C2 subtype. (C) Overall survival within the C4 subtype. (D) Overall survival within the C5 subtype.  
 191 HRR-ab, HRR-aberrant; HRR-wt, HRR wild-type reference population: *CCNE1*-gained plus other HRR  
 192 wild-type cases.

193

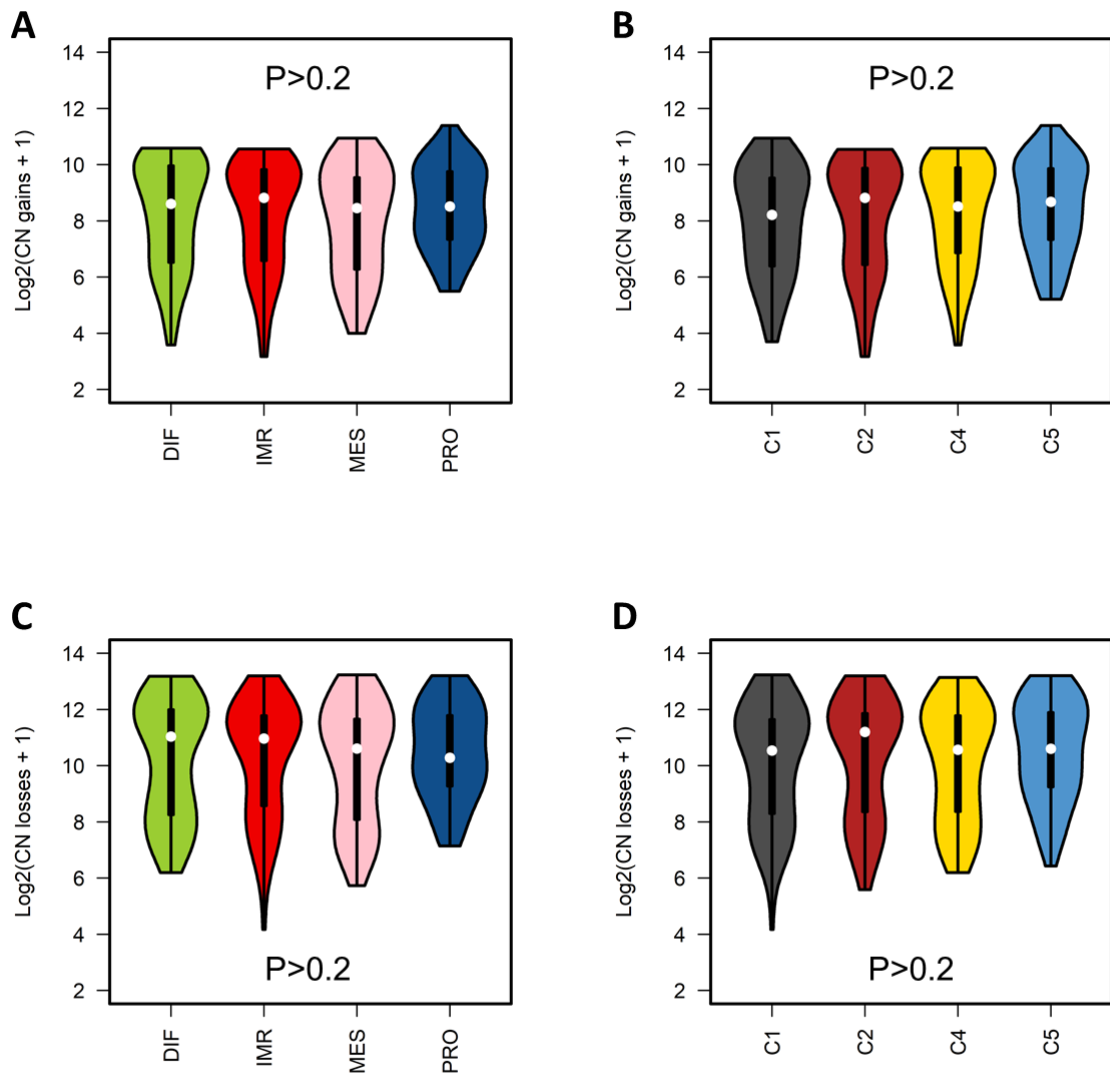

194

195 Figure S5. Violin plots of copy number (CN) gain and CN loss event burden across transcriptomic  
 196 subtypes of high grade serous ovarian carcinoma. (A) CN gain event burden across TCGA  
 197 transcriptomic subtypes. (B) CN gain event burden across Tothill transcriptomic subtypes. (C) CN loss  
 198 event burden across TCGA transcriptomic subtypes. (D) CN loss event burden across Tothill  
 199 transcriptomic subtypes.

200

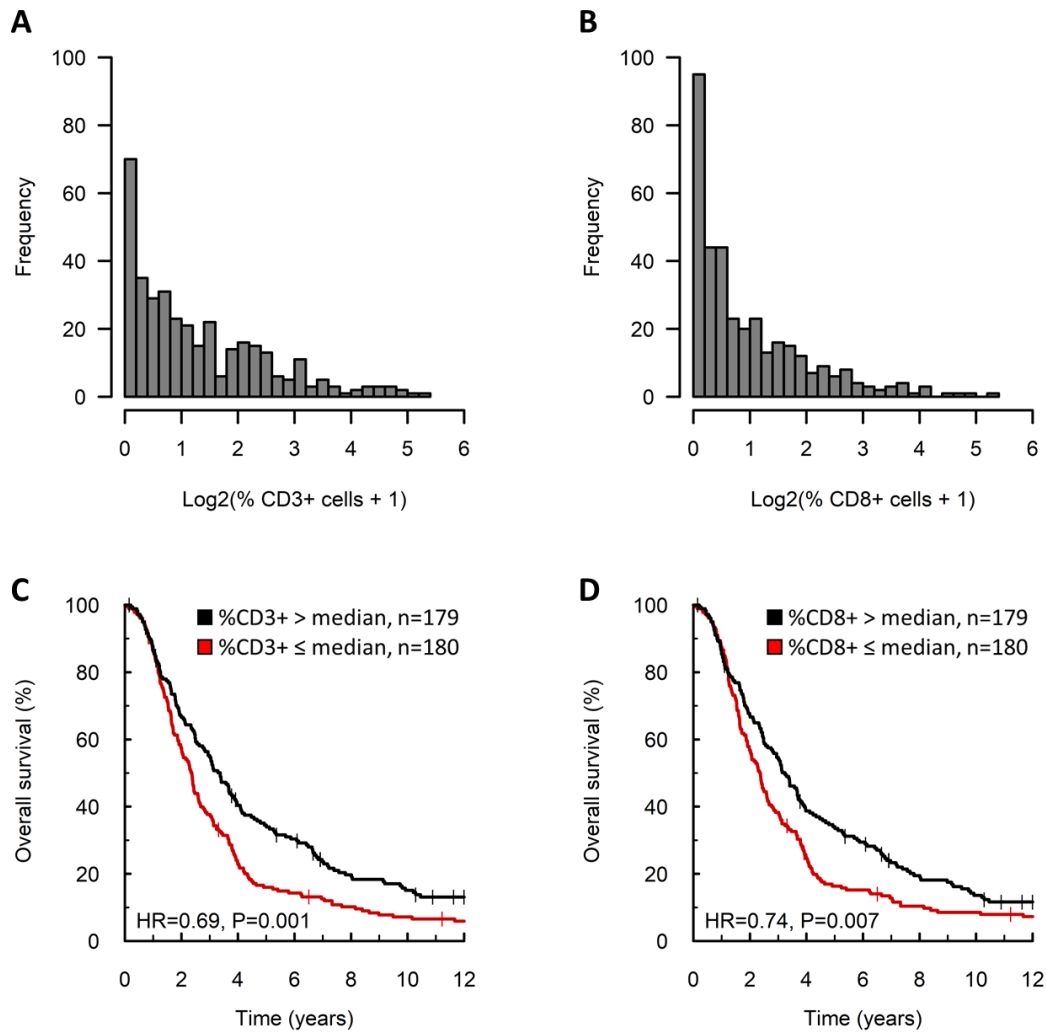

201

202 Figure S6. Tumour-infiltrating immune cells in high grade serous ovarian carcinoma. (A) Distribution  
 203 of CD3+ infiltrating cell burden. (B) Distribution of CD8+ infiltrating cell burden. (C) Impact of CD3+  
 204 infiltrating cell burden on overall survival. (D) Impact of CD8+ infiltrating cell burden on overall  
 205 survival.

206

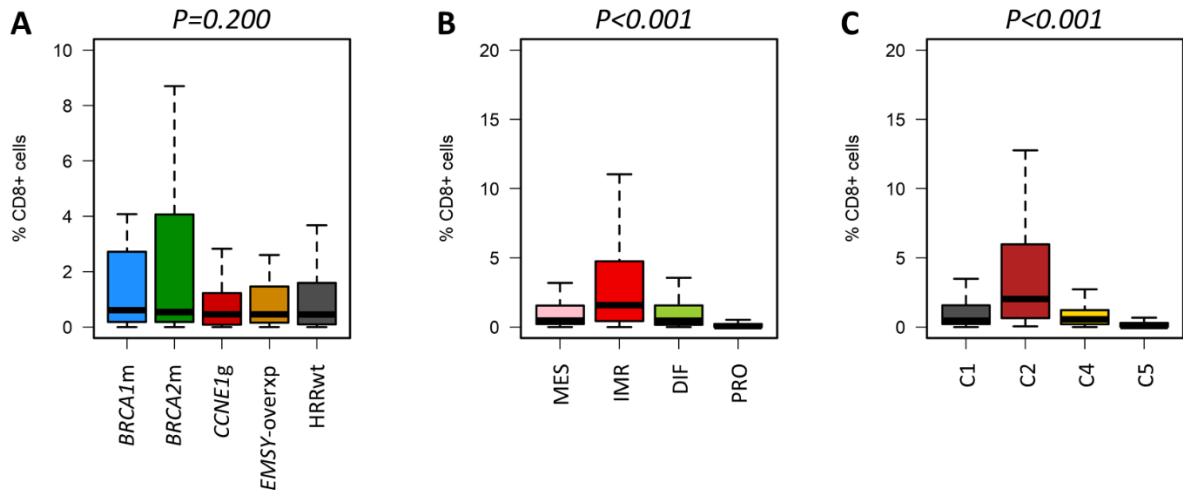

207

208 Figure S7. Tumour-infiltrating CD8+ cells across high grade serous ovarian carcinoma subtypes. (A)  
 209 CD8+ infiltration across HRR-centric subtypes; labelled P value represents comparison of *BRCA2m* and  
 210 *CCNE1g* groups using the Mann Whitney-U test. (B) CD8+ infiltration across TCGA transcriptomic  
 211 subtypes; labelled P value represents comparison of IMR and PRO groups using the Mann Whitney-U  
 212 test. (C) CD8+ infiltration across Tothill transcriptomic subtypes; labelled P value represents  
 213 comparison of C2 and C5 groups using the Mann Whitney-U test. *BRCA2m*, *BRCA2* mutant; *BRCA1m*,  
 214 *BRCA1* mutant; *EMSY-overxp*; overexpression of *EMSY*; *CCNE1g*, gain of *CCNE1*; HRRwt, non-*CCNE1g*  
 215 homologous recombination proficient.

216

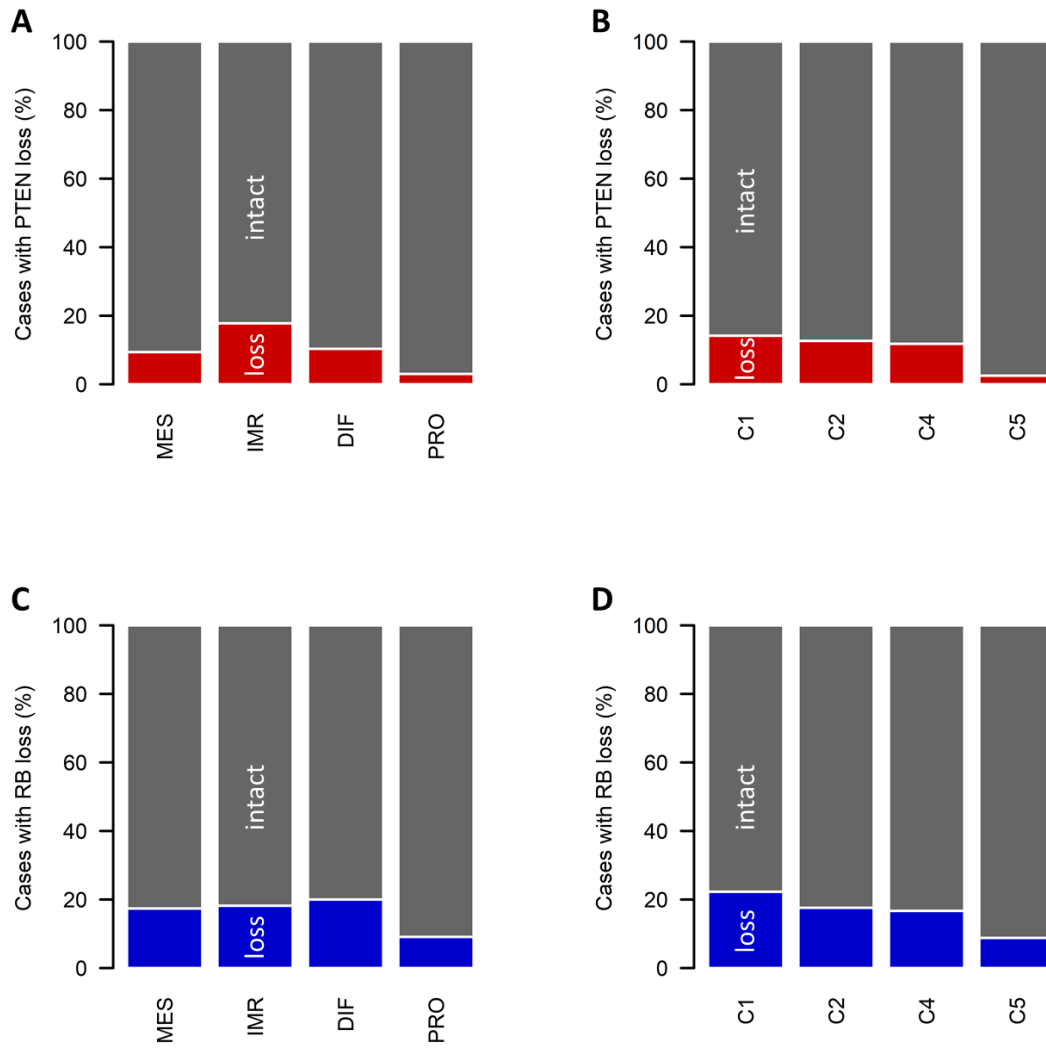

217

218 Figure S8. Loss of PTEN and RB protein expression across transcriptional subtypes of high grade serous  
 219 ovarian carcinoma. (A) PTEN loss across TCGA transcriptomic subtypes. (B) PTEN loss across Tothill  
 220 transcriptomic subtypes. (C) RB loss across TCGA transcriptomic subtypes. (D) RB loss across Tothill  
 221 transcriptomic subtypes.

222



223

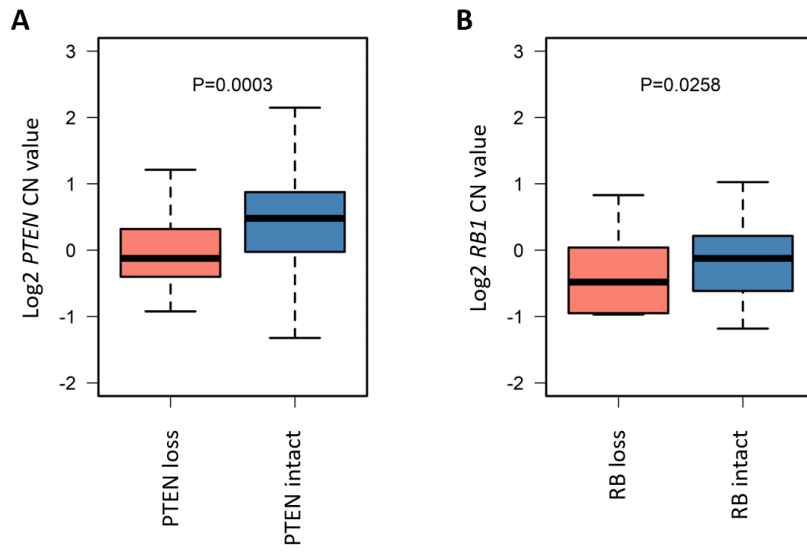

224

225 Figure S9. Calculated copy number (CN) of *PTEN* and *RB1* genes in cases with loss of *PTEN* and loss of  
226 *RB* expression, as determined by CopywriteR. (A) *PTEN* CN estimates between *PTEN*-lost and *PTEN*-  
227 intact cases. (B) *RB1* CN estimates between *RB*-lost and *RB*-intact cases.

228

229

230

231 **Supplementary references**

- 232 1. Gourley C, McCavigan A, Perren T, Paul J, Michie CO, Churchman M, *et al.* Molecular subgroup  
233 of high-grade serous ovarian cancer (HGSOC) as a predictor of outcome following  
234 bevacizumab. *Journal of Clinical Oncology* 2014;**32**(15\_suppl):5502 doi  
235 10.1200/jco.2014.32.15\_suppl.5502.
- 236 2. Hollis RL, Churchman M, Michie CO, Rye T, Knight L, McCavigan A, *et al.* High EMSY expression  
237 defines a BRCA-like subgroup of high-grade serous ovarian carcinoma with prolonged survival  
238 and hypersensitivity to platinum. *Cancer* 2019;**125**(16):2772-81 doi 10.1002/cncr.32079.
- 239 3. Kobel M, Piskorz AM, Lee S, Lui S, LePage C, Marass F, *et al.* Optimized p53  
240 immunohistochemistry is an accurate predictor of TP53 mutation in ovarian carcinoma. *The*  
241 *journal of pathology Clinical research* 2016;**2**(4):247-58 doi 10.1002/cjp2.53.
- 242 4. Garrison E, Marth G. Haplotype-based variant detection from short-read sequencing. *arXiv*  
243 *preprint* 2012;**arXiv:1207.3907 [q-bio.GN]**.
- 244 5. Lai Z, Markovets A, Ahdesmaki M, Chapman B, Hofmann O, McEwen R, *et al.* VarDict: a novel  
245 and versatile variant caller for next-generation sequencing in cancer research. *Nucleic acids*  
246 *research* 2016;**44**(11):e108 doi 10.1093/nar/gkw227.
- 247 6. Cibulskis K, Lawrence MS, Carter SL, Sivachenko A, Jaffe D, Sougnez C, *et al.* Sensitive detection  
248 of somatic point mutations in impure and heterogeneous cancer samples. *Nature*  
249 *biotechnology* 2013;**31**(3):213-9 doi 10.1038/nbt.2514.
- 250 7. Landrum MJ, Lee JM, Riley GR, Jang W, Rubinstein WS, Church DM, *et al.* ClinVar: public  
251 archive of relationships among sequence variation and human phenotype. *Nucleic acids*  
252 *research* 2014;**42**(Database issue):D980-5 doi 10.1093/nar/gkt1113.
- 253 8. Chen GM, Kannan L, Geistlinger L, Kofia V, Safikhani Z, Gendoo DMA, *et al.* Consensus on  
254 Molecular Subtypes of High-Grade Serous Ovarian Carcinoma. *Clinical cancer research : an*  
255 *official journal of the American Association for Cancer Research* 2018;**24**(20):5037-47 doi  
256 10.1158/1078-0432.Ccr-18-0784.
- 257 9. Kuilman T, Velds A, Kemper K, Ranzani M, Bombardelli L, Hoogstraat M, *et al.* CopywriteR:  
258 DNA copy number detection from off-target sequence data. *Genome biology* 2015;**16**(1):49  
259 doi 10.1186/s13059-015-0617-1.
- 260 10. van Belzen I, Schönhuth A, Kemmeren P, Hehir-Kwa JY. Structural variant detection in cancer  
261 genomes: computational challenges and perspectives for precision oncology. *NPJ Precis Oncol*  
262 2021;**5**(1):15 doi 10.1038/s41698-021-00155-6.
- 263 11. Rustin GJ, Vergote I, Eisenhauer E, Pujade-Lauraine E, Quinn M, Thigpen T, *et al.* Definitions  
264 for response and progression in ovarian cancer clinical trials incorporating RECIST 1.1 and CA  
265 125 agreed by the Gynecological Cancer Intergroup (GCIg). *International journal of*  
266 *gynecological cancer : official journal of the International Gynecological Cancer Society*  
267 2011;**21**(2):419-23 doi 10.1097/IGC.0b013e3182070f17.

268
